# Supplementary material
Source: Atypon-hosted journal article supplement (https://sp.blackgold.org/Record/466025/DownloadSupplementalFile?fileId=261)
Supplement: DownloadSupplementalFile [file DownloadSupplementalFile]

# Station Eleven

by Emily St. John Mandel

---

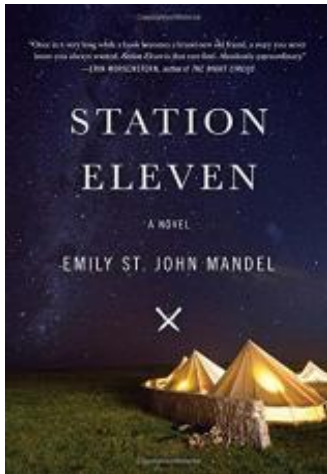

## About the Book

An audacious, darkly glittering novel set in the eerie days of civilization's collapse, *STATION ELEVEN* tells the spellbinding story of a Hollywood star, his would-be savior, and a nomadic group of actors roaming the scattered outposts of the Great Lakes region, risking everything for art and humanity.

One snowy night Arthur Leander, a famous actor, has a heart attack onstage during a production of *King Lear*. Jeevan Chaudhary, a paparazzo-turned-EMT, is in the audience and leaps to his aid. A child actress named Kirsten Raymonde watches in horror as Jeevan performs CPR, pumping Arthur's chest as the curtain drops, but Arthur is dead. That same night, as Jeevan walks home from the theater, a terrible flu begins to spread. Hospitals are flooded and Jeevan and his brother barricade themselves inside an apartment, watching out the window as cars clog the highways, gunshots ring out, and life disintegrates around them.

Fifteen years later, Kirsten is an actress with the Traveling Symphony. Together, this small troupe moves between the settlements of an altered world, performing Shakespeare and music for scattered communities of survivors. Written on their caravan, and tattooed on Kirsten's arm is a line from "Star Trek": "Because survival is insufficient." But when they arrive in St. Deborah by the Water, they encounter a violent prophet who digs graves for anyone who dares to leave.

Spanning decades, moving back and forth in time, and vividly depicting life before and after the pandemic, this suspenseful, elegiac novel is rife with beauty. As Arthur falls in and out of love, as Jeevan watches the newscasters say their final good-byes, and as Kirsten finds herself caught in the crosshairs of the prophet, we see the strange twists of fate that connect them all. A novel of art, memory, and ambition, *STATION ELEVEN* tells a story about the relationships that sustain us, the ephemeral nature of fame, and the beauty of the world as we know it.

## Discussion Guide

1. Now that you've read the entire novel, go back and reread the passage by Czeslaw Milosz that serves as an epigraph. What does it mean? Why did Mandel choose it to introduce STATION ELEVEN?
2. Does the novel have a main character? Who would you consider it to be?
3. Arthur Leander dies while performing King Lear, and the Traveling Symphony performs Shakespeare's works. On page 57, Mandel writes, "Shakespeare was the third born to his parents, but the first to survive infancy. Four of his siblings died young. His son, Hamnet, died at eleven and left behind a twin. Plague closed the theaters again and again, death flickering over the landscape." How do Shakespearean motifs coincide with those of STATION ELEVEN, both the novel and the comic?
4. Arthur's death happens to coincide with the arrival of the Georgia Flu. If Jeevan had been able to save him, it wouldn't have prevented the apocalypse. But how might the trajectory of the novel been different?
5. What is the metaphor of the *Station Eleven* comic books? How does the Undersea connect to the events of the novel?
6. "Survival is insufficient," a line from "Star Trek: Voyager," is the Traveling Symphony's motto. What does it mean to them?
7. On page 62, the prophet discusses death: "I'm not speaking of the tedious variations on physical death. There's the death of the body, and there's the death of the soul. I saw my mother die twice." Knowing who his mother was, what do you think he meant by that?
8. Certain items turn up again and again, for instance the comic books and the paperweight --- things Arthur gave away before he died, because he didn't want any more possessions. And Clark's Museum of Civilization turns what we think of as mundane belongings into totems worthy of study. What point is Mandel making?
9. On a related note, some characters --- like Clark --- believe in preserving and teaching about the time before the flu. But in Kirsten's interview with François Diallo, we learn that there are entire towns that prefer not to: "We went to a place once where the children didn't know the world had ever been different..." (page 115). What are the benefits of remembering, and of not remembering?
10. What do you think happened during the year Kirsten can't remember?
11. In a letter to his childhood friend, Arthur writes that he's been thinking about a quote from Yeats, "Love is like the lion's tooth." (page 158). What does this mean, and why is he thinking about it?
12. How does the impending publication of those letters affect Arthur?

**13.** On page 206, Arthur remembers Miranda saying “I regret nothing,” and uses that to deepen his understanding of Lear, “a man who regrets everything,” as well as his own life. How do his regrets fit into the larger scope of the novel? Other than Miranda, are there other characters that refuse to regret?

**14.** Throughout the novel, those who were alive during the time before the flu remember specific things about those days: the ease of electricity, the taste of an orange. In their place, what do you think you’d remember most?

**15.** What do you imagine the Traveling Symphony will find when they reach the brightly lit town to the south?

**16.** The novel ends with Clark, remembering the dinner party and imagining that somewhere in the world, ships are sailing. Why did Mandel choose to end the novel with him?

## Author Bio

Emily St. John Mandel was born and raised on the west coast of British Columbia, Canada. She studied contemporary dance at the School of Toronto Dance Theatre and lived briefly in Montreal before relocating to New York.

Her fourth novel, *STATION ELEVEN*, released in September 2014. All three of her previous novels --- *LAST NIGHT IN MONTREAL*, *THE SINGER'S GUN* and *THE LOLA QUARTET* --- were Indie Next Picks, and *THE SINGER'S GUN* was the 2014 winner of the Prix Mystere de la Critique in France. Her short fiction and essays have been anthologized in numerous collections, including *BEST AMERICAN MYSTERY STORIES* 2013. She is a staff writer for *The Millions*. She lives in New York City with her husband.

---

## Station Eleven

by Emily St. John Mandel

**Publication Date:** September 9, 2014

**Genres:** Fiction, Post-Apocalyptic Fiction

**Hardcover:** 352 pages

**Publisher:** Knopf

**ISBN-10:** 0385353308

**ISBN-13:** 9780385353304
